# Supplementary material
Source: PubMed Central journal article supplement (PMC3953817)
Supplement: supp_127.6.1293_JCS141465.pdf [file supp_127.6.1293_JCS141465.pdf]

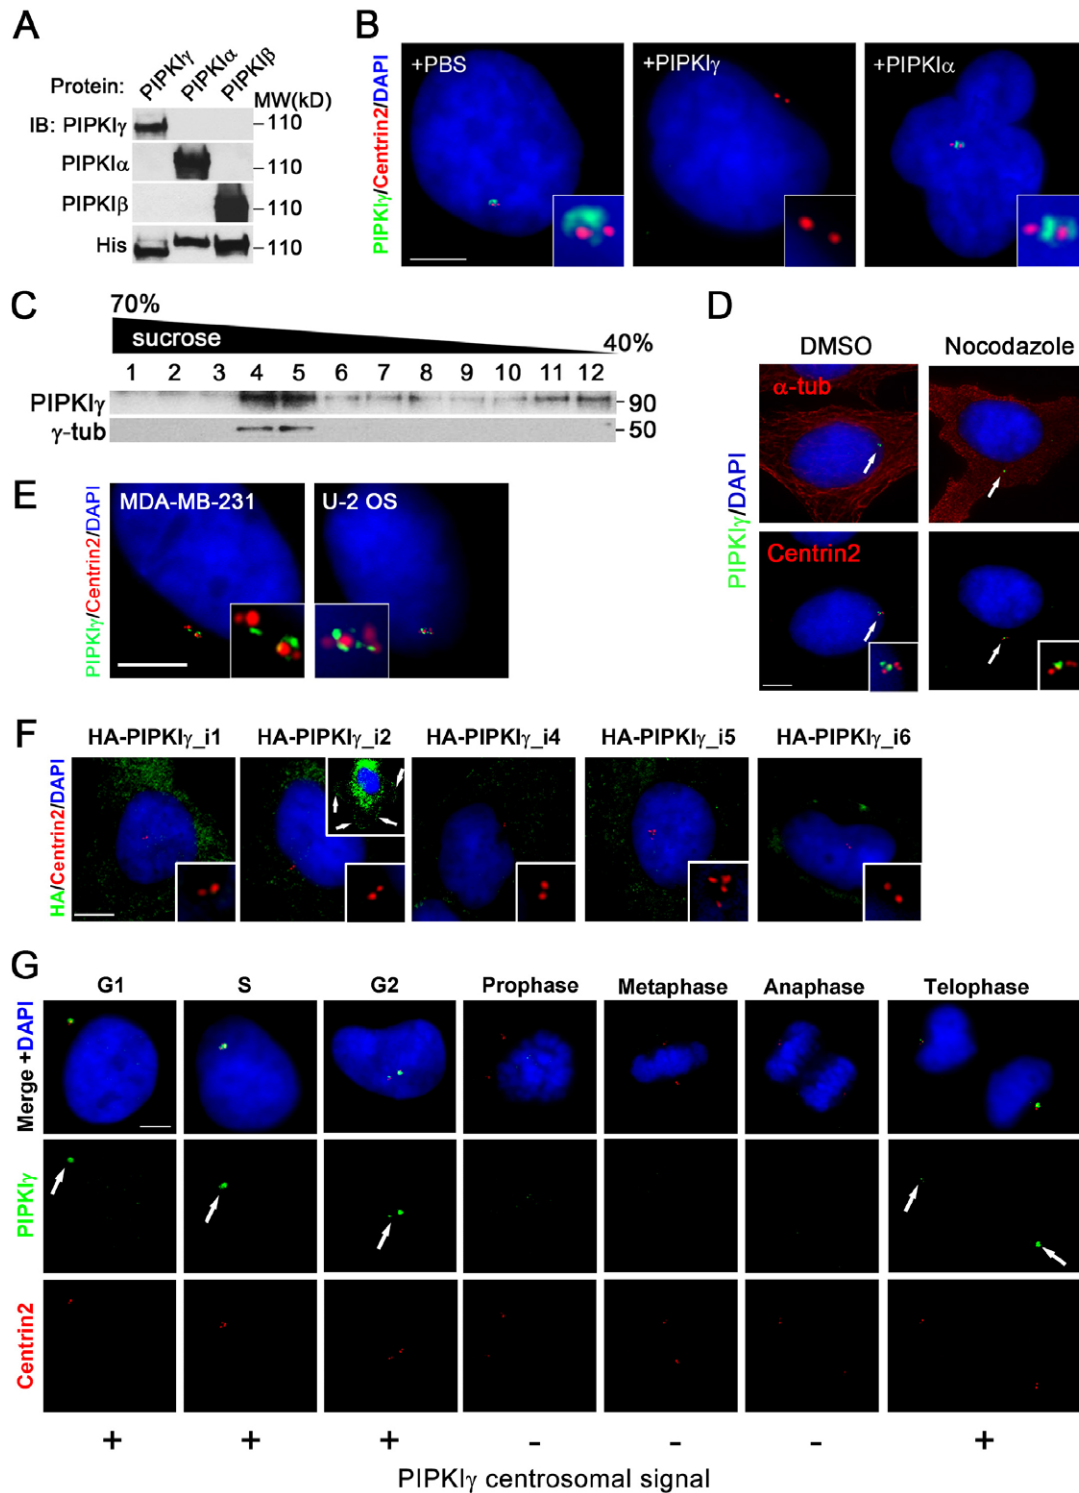

**Fig. S1. PIPKI $\gamma$  associates with the centrosome and it is regulated within the cell cycle.** (A) Purified anti-PIPKI $\gamma$ , PIPKI $\alpha$ , and PIPKI $\beta$  antibodies are specific. Same amount of recombinant GST-His-PIPKI $\alpha$ , GST-His-PIPKI $\beta$  and His-PIPKI $\gamma$  proteins were blotted with indicated antibodies. (B) Staining of PIPKI $\gamma$  at centrosome was abolished by excessive purified recombinant PIPKI $\gamma$ , but not PIPKI $\alpha$  (20-fold higher than PIPKI $\gamma$  antibody). (C) PIPKI $\gamma$  co-sediments with centrosomes isolated from mouse kidneys using 40-70% sucrose gradients. (D) Association of PIPKI $\gamma$  with centrioles is independent of the integrity of microtubule network. HeLa cells were treated with 10  $\mu$ M nocodazole for 1 hour, and stained with indicated antibodies. Arrows show centrioles. Cells treated with DMSO were used as a negative control. (E) PIPKI $\gamma$  localizes at the centrosome in MDA-MB-231 and U-2 OS cells. (F) HeLa cells were transfected with HA-tagged HA-PIPKI $\gamma$ \_i1, i2, i4, i5, and i6, then fixed and stained with anti-HA and Centrin2 antibodies. Insert at top right of the HA-PIPKI $\gamma$ \_i2 panel shows the focal adhesion (FA) targeting of HA-PIPKI $\gamma$ \_i2 (indicated by arrows) at the bottom of the same cell below the centriole focus plane. (G) The association of PIPKI $\gamma$  with centrosome is regulated within the cell cycle. PIPKI $\gamma$  targets to the centrosome in G1, S, and G2 phases, but is absent from the centrosome in M phase until telophase. HeLa cells were stained with anti-PIPKI $\gamma$  and Centrin2 antibodies, as well as DAPI. Arrows indicate PIPKI $\gamma$  signal on centrosomes. (B, D, E, F and G) Scale bars, 5  $\mu$ m. Inserts at the bottom show magnified centrosome images.

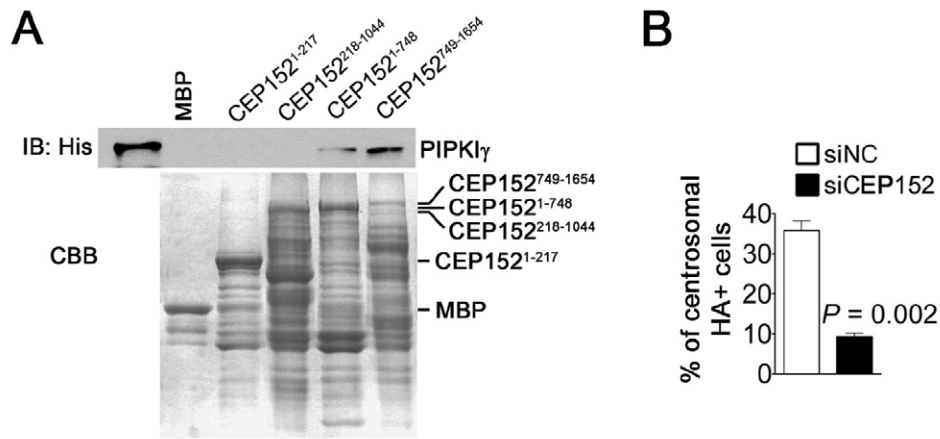

**Fig. S2. CEP152 regulates PIPKI $\gamma$  targeting to the centrosome.** (A) PIPKI $\gamma$  interaction with CEP152 fragments. His-PIPKI $\gamma$  was incubated with purified recombinant MBP or indicated MBP-tagged CEP152 fragments in MBP pull-down assay. The precipitates were analyzed by immunoblotting using anti-His antibody. Loading of MBP and MBP-fused CEP152 was shown by Coomassie Brilliant Blue (CBB) staining. (B) Loss of CEP152 abolished the centrosomal targeting of exogenous PIPKI $\gamma$ . HeLa cells treated with control or CEP152 specific siRNAs were transfected with HA-PIPKI $\gamma$ <sup>1-445</sup>, and then stained with anti-HA and Centrin2 antibodies and analyzed by fluorescence microscopy. Cells with centrosomal HA signal were quantified and plotted from three independent experiments (n>200).

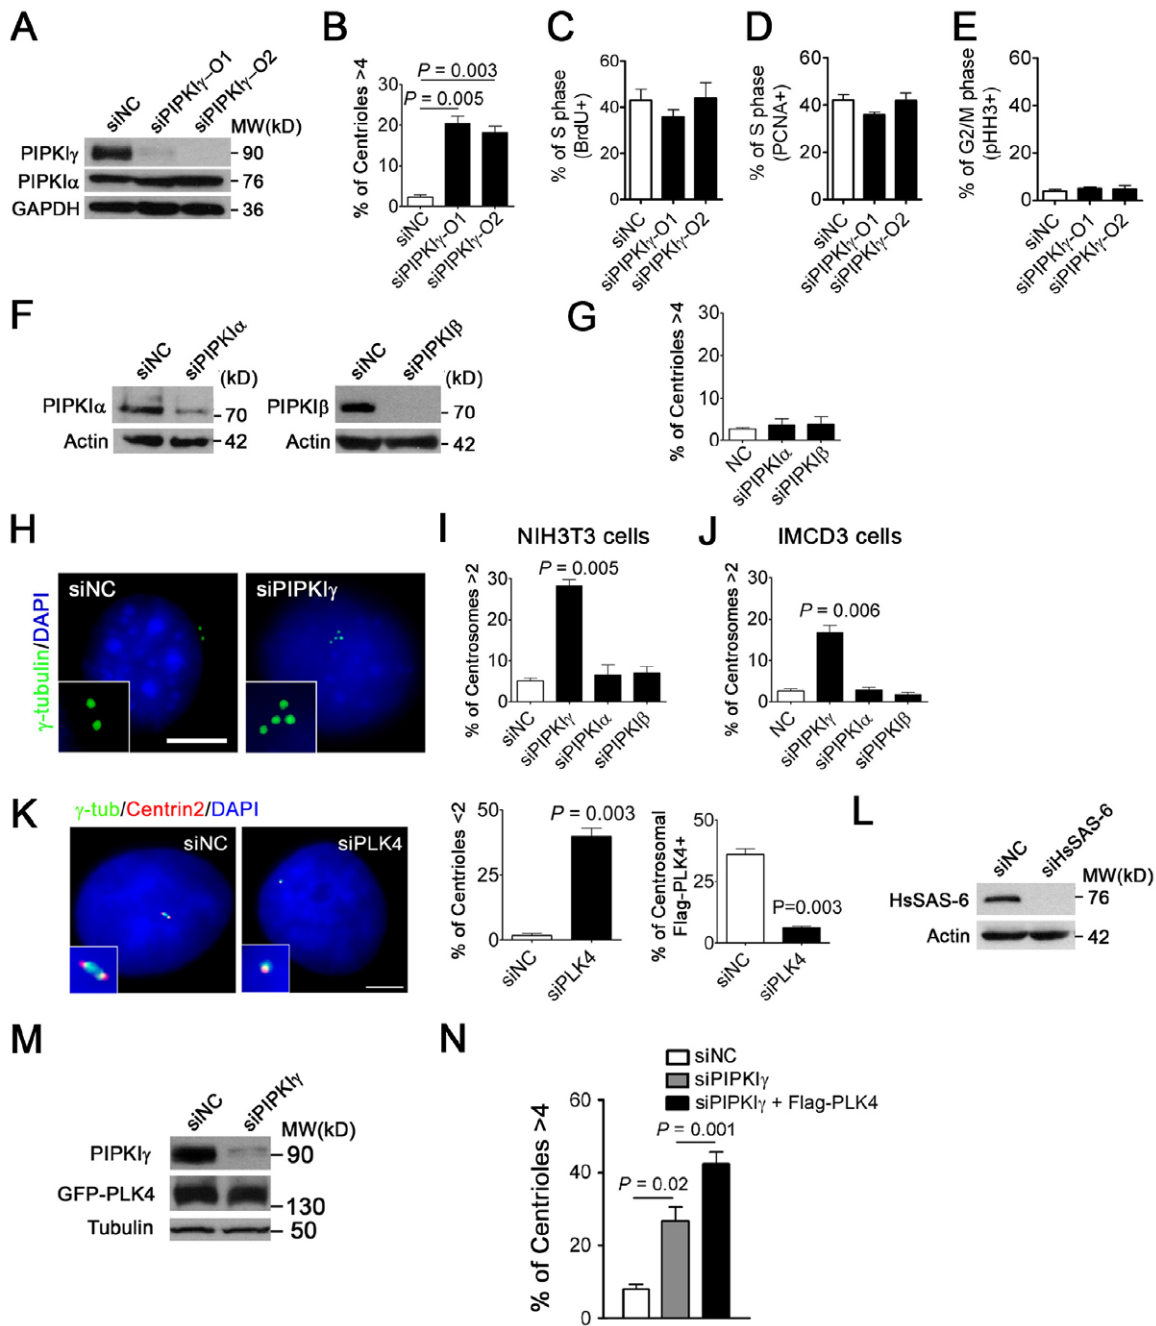

**Fig. S3. Depletion of PIPKI $\gamma$  induces excessive Centrin2 foci in cells, but does not arrest cells in S- or G2/M- phases.** (A, B) Depletion of PIPKI $\gamma$  by two independent siRNAs (siPIPKI $\gamma$ -O1, siPIPKI $\gamma$ -O2) results in centriole amplification. HeLa cells treated with control (siNC) or PIPKI $\gamma$ -specific (siPIPKI $\gamma$ -O1, siPIPKI $\gamma$ -O2) siRNA were stained with anti-Centrin2 antibody and DAPI. Percentage of cells with >4 centrioles was quantified and plotted. (C-E) Depleting PIPKI $\gamma$  does not cause S- or G2/M-phase arrest. HeLa cells treated with indicated siRNAs were subjected to BrdU incorporation assay (C), PCNA staining (D), and phosphor-Histon H3 (pHH3) staining (E). Percentage of cells with positive signal in each group was quantified. No significant difference was observed between the control and PIPKI $\gamma$  depleted cells. (F) Specific depletion of endogenous PIPKI $\alpha$  (siPIPKI $\alpha$ ), PIPKI $\beta$  (siPIPKI $\beta$ ). (G) No amplification of Centrin2 foci was observed in PIPKI $\alpha$  or PIPKI $\beta$  depleted cells. Percentage of cells with >4 centrioles was quantified in each group. (H-J) Depletion of PIPKI $\gamma$  induces centrosome amplification in NIH3T3 and IMCD3 cells. NIH3T3 cells treated for 5 days (H, I) and IMCD3 cells were treated for 3.5 days (J) with indicated siRNAs. The percentage of cells with >2 centrosomes was quantified in each group. (K) PLK4-specific siRNA strongly suppresses the expression and function of PLK4. Left panels, HeLa cells were treated with control (siNC) or PLK4-specific (siPLK4) siRNA and stained with indicated antibodies and DAPI. Middle panel, percentage of cells with less than two centrioles was quantified. Right panel, expression of presence of Flag-PLK4 at the centrosome was abolished by treated cells with PLK4 siRNA. (L) HsSAS-6 specific siRNA efficiently knocked down endogenous HsSAS-6. (M) Depletion of PIPKI $\gamma$  had no effect on GFP-PLK4 level. (N) Depletion of PIPKI $\gamma$  enhances centriole amplification resulted from PLK4 overexpression. HeLa cells were treated with siNC or PIPKI $\gamma$  siRNA (siPIPKI $\gamma$ ) for 48 hours, and then were transfected with Flag-PLK4 for additional 12 h before fixation. Percentage of cells with >4 centrioles in control cells (siNC), PIPKI $\gamma$ -depleted cells (siPIPKI $\gamma$ ), or PIPKI $\gamma$ -depleted cells transfected with Flag-PLK4 (siPIPKI $\gamma$  + Flag-PLK4) was quantified. (B-E, G, I-J, K-N) n > 200, at least three independent experiments. (H, K) Scale bars, 5  $\mu$ m.

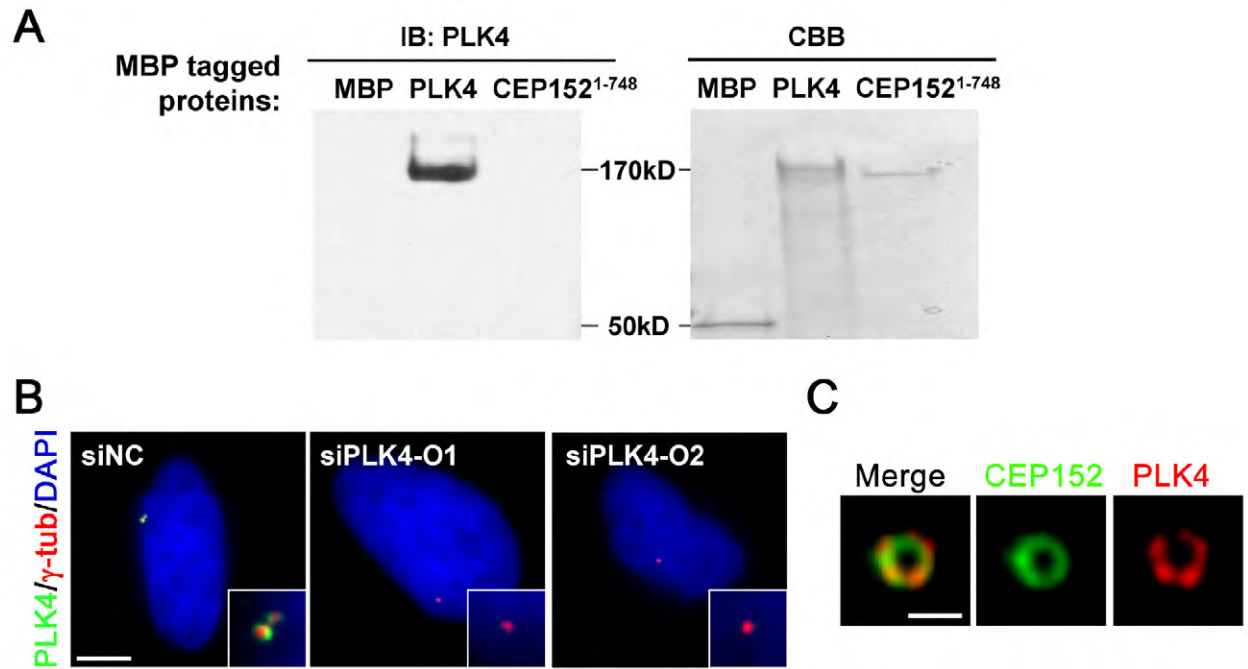

**Fig. S4. Characterization of a new monoclonal PLK4 antibody.** (A) The in-house monoclonal PLK4 antibody specifically recognized PLK4 by immunoblotting. Same amount of recombinant MBP, MBP-PLK4, and MBP-CEP152<sup>1-748</sup> proteins were blotted with indicated antibodies. Loading of each protein was shown by Coomassie Brilliant Blue (CBB) staining. (B) The in-house PLK4 antibody specifically recognized endogenous PLK4 at the centrosome by immunofluorescence. Depletion of PLK4 using two independent PLK4 specific siRNAs (siPLK4-O1, siPLK4-O2) abolished the centrosome signal recognized by anti-PLK4 antibody. Anti- $\gamma$ -tubulin was used to label centrosomes. Enlarged centrosome images were shown as inserts. DNA was stained with DAPI. Scale bar, 5  $\mu$ m. (C) PLK4 and CEP152 colocalize at the centrosome. 3D-SIM images showed that PLK4 colocalizes with CEP152. HeLa cells were processed through indirect immunofluorescence with antibodies against CEP152 and PLK4, and analyzed by 3D-SIM. Scale bar, 0.5  $\mu$ m.
